# Supplementary material for: The Host Range and Risk Assessment of the Stem-Boring Weevil, Listronotus setosipennis (Coleoptera: Curculionidae) Proposed for the Biological Control of Parthenium hysterophorus (Asteraceae) in Pakistan
Source: MDPI journal article supplement (doi:10.3390/insects12050463), 2021-05-17
Supplement: s1 [file s1]

**Table S1.** The test plant species from Australia [21] and Ethiopia [22] that have already been tested with *Listronotus setosipennis* in each respective country prior to release. Each country found no evidence for the potential of *L. setosipennis* to have non-target impacts on either native or economically important crop species.

| Family     | Tribe         | Species (Cultivar)                       | Country where tested |
|------------|---------------|------------------------------------------|----------------------|
| Asteraceae | Anthemideae   | <i>Chrysanthemum sinense</i>             | Australia            |
| Asteraceae | Astereae      | <i>Baccharis halimifolia</i>             | Australia            |
| Asteraceae | Astereae      | <i>Conyza bonariensis</i>                | Ethiopia             |
| Asteraceae | Cichorieae    | <i>Cichorium intybus</i>                 | Australia,           |
| Asteraceae | Cichorieae    | <i>Lactuca sativa</i>                    | Australia, Ethiopia  |
| Asteraceae | Coreopsidaeae | <i>Bidens pilosa</i>                     | Australia            |
| Asteraceae | Coreopsidaeae | <i>Dahlia</i> sp.                        | Australia            |
| Asteraceae | Cynareae      | <i>Carthamus tinctorius</i>              | Australia, Ethiopia  |
| Asteraceae | Eupatorieae   | <i>Ageratina riparia</i>                 | Australia            |
| Asteraceae | Gnaphalieae   | <i>Cassinia laevis</i>                   | Australia            |
| Asteraceae | Heliantheae   | <i>Acanthospermum hispidum</i>           | Australia            |
| Asteraceae | Heliantheae   | <i>Ambrosia tenuifolia</i>               | Australia            |
| Asteraceae | Heliantheae   | <i>Bidens ghedoensis</i>                 | Ethiopia             |
| Asteraceae | Heliantheae   | <i>Bidens pilosa</i>                     | Ethiopia             |
| Asteraceae | Heliantheae   | <i>Bidens pachyloma</i>                  | Ethiopia             |
| Asteraceae | Heliantheae   | <i>Cosmos</i> sp.                        | Australia            |
| Asteraceae | Heliantheae   | <i>Eclipta alba</i>                      | Australia            |
| Asteraceae | Heliantheae   | <i>Galinsoga parviflora</i>              | Ethiopia             |
| Asteraceae | Heliantheae   | <i>Helianthus annuus</i> (R. Black)      | Ethiopia             |
| Asteraceae | Heliantheae   | <i>Helianthus annuus</i> (Oissa)         | Ethiopia             |
| Asteraceae | Heliantheae   | <i>Helianthus annuus</i> (Hysun 21)      | Australia            |
| Asteraceae | Heliantheae   | <i>Helianthus annuus</i> (Polestar)      | Australia            |
| Asteraceae | Heliantheae   | <i>Helianthus annuus</i> (Sunbred 27)    | Australia            |
| Asteraceae | Heliantheae   | <i>Helianthus annuus</i> (Suncross)      | Australia            |
| Asteraceae | Heliantheae   | <i>Helianthus annuus</i> (Sungold)       | Australia            |
| Asteraceae | Heliantheae   | <i>Helianthus annuus</i> (Yates Sunbred) | Australia            |
| Asteraceae | Heliantheae   | <i>Parthenium argentatum</i>             | Australia            |
| Asteraceae | Heliantheae   | <i>Siegesbeckia orientalis</i>           | Australia            |
| Asteraceae | Heliantheae   | <i>Zinnia</i> sp.                        | Australia            |
| Asteraceae | Millerieae    | <i>Guizotia abyssinica</i> (ESTE)        | Ethiopia             |
| Asteraceae | Millerieae    | <i>Guizotia abyssinica</i> (Fogera)      | Ethiopia             |
| Asteraceae | Millerieae    | <i>Guizotia abyssinica</i> (Kuyu)        | Ethiopia             |
| Asteraceae | Millerieae    | <i>Guizotia abyssinica</i> (Local)       | Ethiopia             |
| Asteraceae | Millerieae    | <i>Guizotia abyssinica</i> (Shambu)      | Ethiopia             |
| Asteraceae | Millerieae    | <i>Guizotia abyssinica</i> (Ghinchi)     | Ethiopia             |
| Asteraceae | Millerieae    | <i>Guizotia scabra</i>                   | Ethiopia             |

| Family         | Tribe        | Species (Cultivar)                | Country where tested |
|----------------|--------------|-----------------------------------|----------------------|
| Asteraceae     | Neurolaeneae | <i>Galinsoga parviflora</i>       | Australia            |
| Asteraceae     | Tageteae     | <i>Flaveria trinervia</i>         | Ethiopia             |
| Asteraceae     | Tageteae     | <i>Tagetes minuta</i>             | Ethiopia             |
| Asteraceae     | Vernonieae   | <i>Vernonia galamensis</i>        | Ethiopia             |
| Anacardiaceae  |              | <i>Mangifera indica</i>           | Australia            |
| Annonaceae     |              | <i>Annona reticulata</i>          | Australia            |
| Apiaceae       |              | <i>Apium graveolens</i>           | Australia            |
| Apiaceae       |              | <i>Daucus carota</i>              | Australia            |
| Apiaceae       |              | <i>Petroselinum crispum</i>       | Australia            |
| Brassicaceae   |              | <i>Brassica carinata</i>          | Ethiopia             |
| Brassicaceae   |              | <i>Brassica oleracea</i>          | Australia, Ethiopia  |
| Brassicaceae   |              | <i>Brassica rapa</i>              | Australia            |
| Bromeliaceae   |              | <i>Ananas comosus</i>             | Australia            |
| Caricaceae     |              | <i>Carica papaya</i>              | Australia            |
| Chenopodiaceae |              | <i>Beta vulgaris</i>              | Australia            |
| Convolvulaceae |              | <i>Ipomoea batata</i>             | Australia            |
| Cucurbitaceae  |              | <i>Cucumis sativus</i>            | Australia            |
| Cucurbitaceae  |              | <i>Cucurbita maxima</i>           | Australia            |
| Fabaceae       |              | <i>Arachis hypogaea</i>           | Australia            |
| Fabaceae       |              | <i>Cicer arietinum</i>            | Ethiopia             |
| Fabaceae       |              | <i>Glycine max</i>                | Australia            |
| Fabaceae       |              | <i>Lathyrus sativus</i>           | Ethiopia             |
| Fabaceae       |              | <i>Lens culinaris</i>             | Ethiopia             |
| Fabaceae       |              | <i>Macroptilium atropurpureum</i> | Australia            |
| Fabaceae       |              | <i>Medicago sativa</i>            | Australia            |
| Fabaceae       |              | <i>Phaseolus vulgaris</i>         | Australia            |
| Fabaceae       |              | <i>Pisum sativum</i>              | Ethiopia             |
| Fabaceae       |              | <i>Vicia faba</i>                 | Ethiopia             |
| Lauraceae      |              | <i>Persea americana</i>           | Australia            |
| Liliaceae      |              | <i>Allium cepa</i>                | Australia            |
| Linaceae       |              | <i>Linum usitatissimum</i>        | Australia            |
| Malvaceae      |              | <i>Corchorus olitorius</i>        | Ethiopia             |
| Malvaceae      |              | <i>Gossypium hirsutum</i>         | Ethiopia             |
| Malvaceae      |              | <i>Gossypium sp.</i>              | Australia            |
| Musaceae       |              | <i>Eucalyptus grandis</i>         | Australia            |
| Musaceae       |              | <i>Melaleuca armillaris</i>       | Australia            |
| Passifloraceae |              | <i>Passiflora edulis</i>          | Australia            |
| Pedaliaceae    |              | <i>Sesamum indicum</i>            | Ethiopia             |
| Pinaceae       |              | <i>Pinus elliotti</i>             | Australia            |
| Poaceae        |              | <i>Chloris gayana</i>             | Australia            |
| Poaceae        |              | <i>Dicanthium sericeum</i>        | Australia            |

| Family        | Tribe | Species (Cultivar)             | Country where tested |
|---------------|-------|--------------------------------|----------------------|
| Poaceae       |       | <i>Eragrostis tef</i>          | Ethiopia             |
| Poaceae       |       | <i>Hordeum vulgare</i>         | Australia            |
| Poaceae       |       | <i>Lolium multiflorum</i>      | Australia,           |
| Poaceae       |       | <i>Lolium perenne</i>          | Australia            |
| Poaceae       |       | <i>Saccharum officinarum</i>   | Australia            |
| Poaceae       |       | <i>Sorghum bicolor</i>         | Ethiopia             |
| Poaceae       |       | <i>Sorghum vulgare</i>         | Australia            |
| Poaceae       |       | <i>Triticum aestivum</i>       | Australia, Ethiopia  |
| Poaceae       |       | <i>Zea mays</i>                | Australia, Ethiopia  |
| Proteaceae    |       | <i>Macadamia integrifolia</i>  | Australia            |
| Rosaceae      |       | <i>Fragaria vesca</i>          | Australia            |
| Rosaceae      |       | <i>Malus sylvestris</i>        | Australia            |
| Rosaceae      |       | <i>Prunus domesticus</i>       | Australia            |
| Rosaceae      |       | <i>Prunus persica</i>          | Australia            |
| Rosaceae      |       | <i>Pyrus communis</i>          | Australia            |
| Rosaceae      |       | <i>Rosa</i> sp.                | Australia            |
| Rubiaceae     |       | <i>Coffea arabica</i>          | Australia            |
| Rutaceae      |       | <i>Citrus sinense</i>          | Australia            |
| Solanaceae    |       | <i>Capsicum annum</i>          | Australia, Ethiopia  |
| Solanaceae    |       | <i>Lycopersicon esculentum</i> | Australia            |
| Solanaceae    |       | <i>Nicotiana tabacum</i>       | Australia            |
| Solanaceae    |       | <i>Solanum lycopersicum</i>    | Ethiopia             |
| Solanaceae    |       | <i>Solanum tuberosum</i>       | Australia, Ethiopia  |
| Vitaceae      |       | <i>Vitis vinifera</i>          | Australia            |
| Zingiberaceae |       | <i>Zingiber officinale</i>     | Australia            |
